# Supplementary material for: Surfactant-modified MFI nanosheets: a high capacity anion-exchanger
Source: Royal Society of Chemistry journal article supplement (doi:10.1039/c0cc03604h), 2010-11-15

## Supporting Information

### Surfactant-modified MFI nanosheets: a high capacity anion-exchanger

Joachim Schick, T. Jean Daou, Philippe Caullet, Jean-Louis Paillaud, Joël Patarin and Claire Mangold-Callarec

### **<sup>29</sup>Si MAS NMR of as-made zeolite MFI single-unit-cell nanosheets**

The <sup>29</sup>Si MAS DEC NMR experiments were performed on a Bruker DSX 400 spectrometer using the following conditions :  
frequency : 376.5 MHz ; spinning rate : 4 kHz ; chemical shift standard : TMS,  
pulse width : 4.45 μs ; flip angle : π/2 ; recycling time : 60 s

The decomposition of the spectrum is performed using the Dmfit software:  
% Q<sup>3</sup> (-102.2 ppm) ≈ 20% and % Q<sup>4</sup> (-112.9 ppm) ≈ 80%

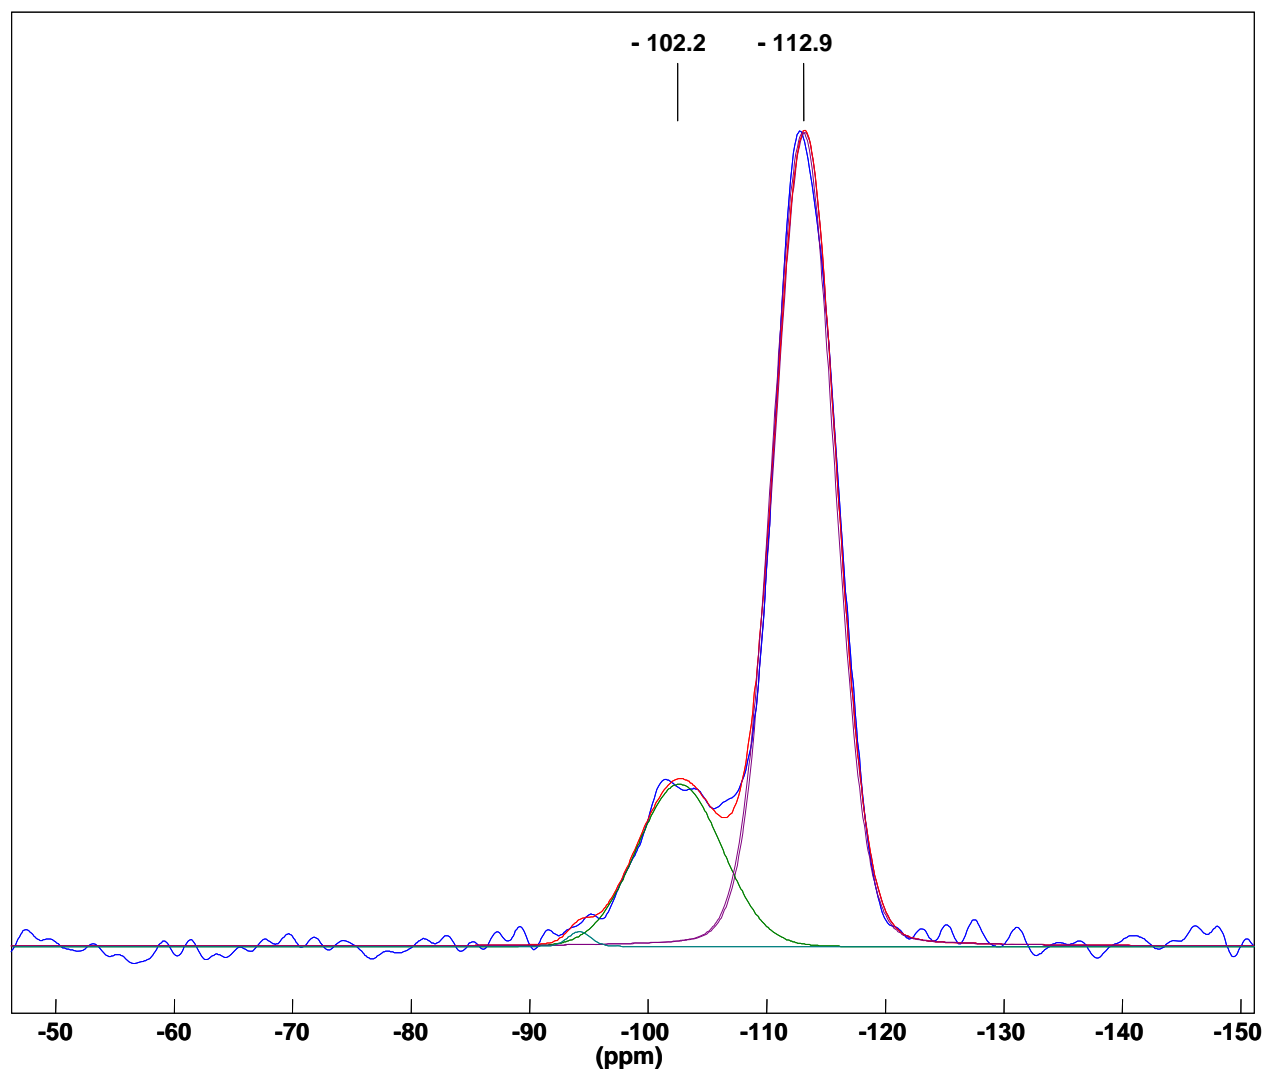

Supplement: c0cc03604h.pdf [file c0cc03604h.pdf]
